# Supplementary material for: Hepatic NOD2 promotes hepatocarcinogenesis via a RIP2-mediated proinflammatory response and a novel nuclear autophagy-mediated DNA damage mechanism
Source: Springer Nature journal article supplement (doi:10.1186/s13045-020-01028-4), 2021-01-07
Supplement: MOESM3 [file 18748092]

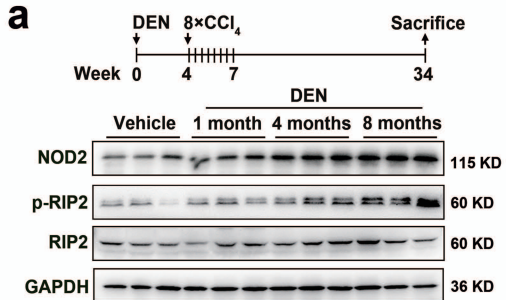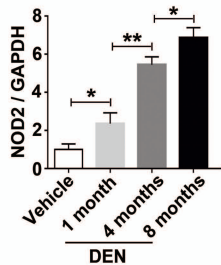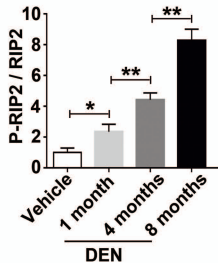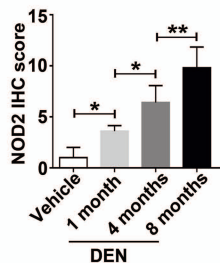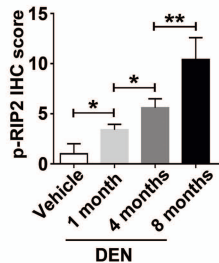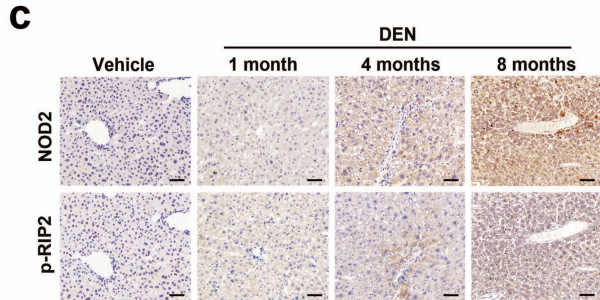

Online Fig. 1

**Online Fig. 1. NOD2 expression increases during the progression of DEN/CCl<sub>4</sub>-induced HCC, accompanied by an increase of p-RIP2 expression.**

**a** Representative expression patterns of liver NOD2 and p-RIP2 and quantification of relative intensity in different phases (1, 4, and 8 months) of DEN/CCl<sub>4</sub>-induced HCC model in wild-type (WT) mice, n=3. **b** Representative immunohistochemistry images of liver NOD2 and p-RIP2 (top panel) and the quantification of immunohistochemistry scores (bottom panel) in different phases of DEN/CCl<sub>4</sub>-induced HCC model in WT mice, n = 5. Data were shown as mean  $\pm$  SD and significance was determined using ordinary one-way ANOVA with a Sidak test (**a** and **b**). \* $P < 0.05$ , \*\* $P < 0.01$ . Scale bar, 50  $\mu$ m.

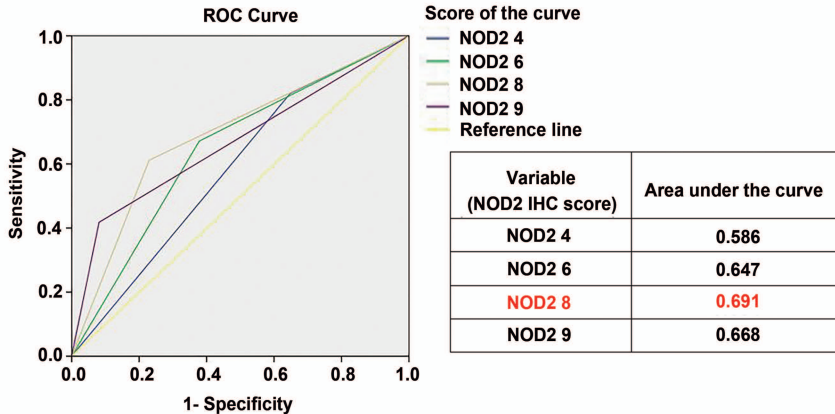

**Online Fig. 2**

**Online Fig. 2. Receiver operating characteristic (ROC) curve analysis of NOD2 immunohistochemistry staining.**

ROC curve analysis showed that the optimal cut-off value of NOD2 was 8 and the area under the curve (AUC) was 0.691 (95% CI, 0.602-0.780,  $P < 0.001$ ).  $\text{NOD2} \geq 8$  was considered as high expression of NOD2 and  $\text{NOD2} < 8$  was considered as low expression.

**a**

Donor and CRISPR/Cas9 System

Wild-type allele

Conditional KO allele

KO allele

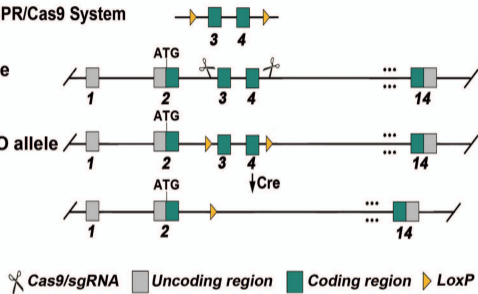**b**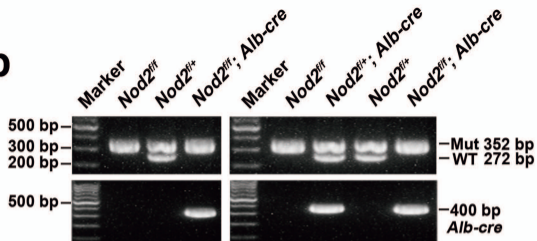**c**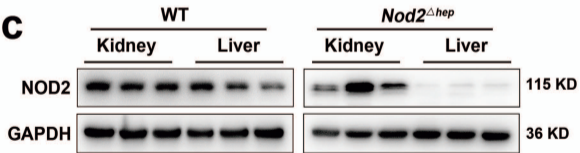

Online Fig. 3

**Online Fig. 3. Generation of hepatocyte-specific *Nod2*-knockout mice (*Nod2*<sup>Δ*hep*</sup>).**

**a** Schematic representation of the strategy to generate the *Nod2* conditional allele. **b**

Genotyping of *Nod2*<sup>loxp/loxp</sup> (*Nod2*<sup>f/f</sup>), *Nod2*<sup>loxp/+</sup> (*Nod2*<sup>f/+</sup>) and *Nod2*<sup>loxp/loxp</sup> Alb-cre

(*Nod2*<sup>Δ*hep*</sup>). The wild-type (WT) allele yields an amplicon of 272 bp, while the floxed

allele yields an amplicon of 352 bp. **c** Western blotting analysis of NOD2 protein in the

livers and kidneys of WT and *Nod2*<sup>Δ*hep*</sup> mice.

## Genes positively co-enriched with NOD2 in HCC

**a**

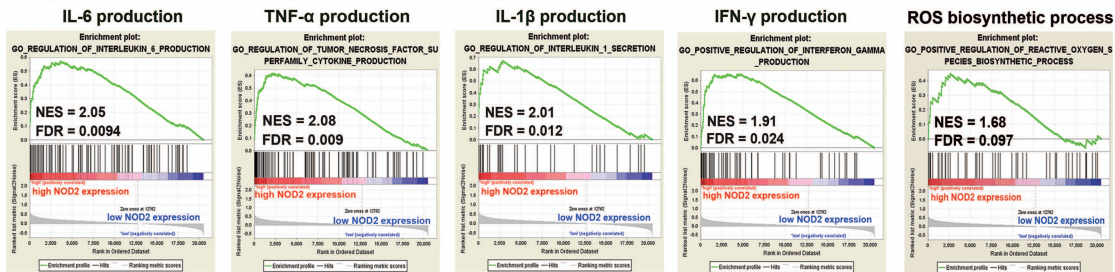

**b**

## Pathways positively co-enriched with NOD2 in HCC

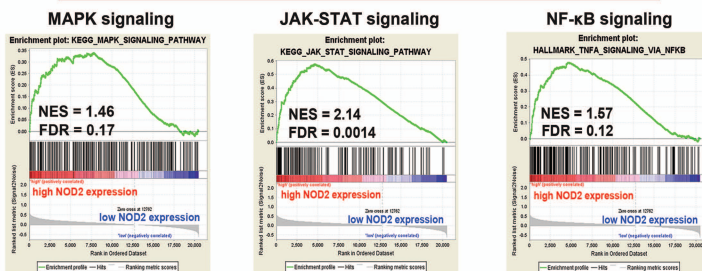

**c**

## Genes negatively co-enriched with NOD2 in HCC

### DNA damage recognition

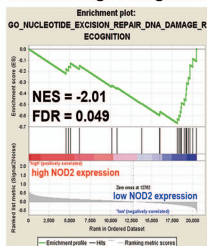

### DNA repair

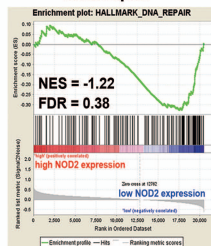

**Online Fig. 4. Gene set enrichment analysis (GSEA) of the correlation between NOD2 expression and inflammation, as well as DNA damage in patients with HCC.**

HCC cohort data were downloaded from the TCGA database. **a-b** GSEA reveals the positive correlation of NOD2 expression with inflammatory cytokines production (IL-6, TNF $\alpha$ , IL-1 $\beta$ , and IFN- $\gamma$ ), with ROS biosynthetic process (**a**), and with pro-inflammatory pathways (**b**) in patients with HCC. **c** GSEA reveals the negative correlation of NOD2 expression with DNA damage recognition, and with DNA repair in patients with HCC. NES, normalized enrichment score; FDR, false discovery rate.



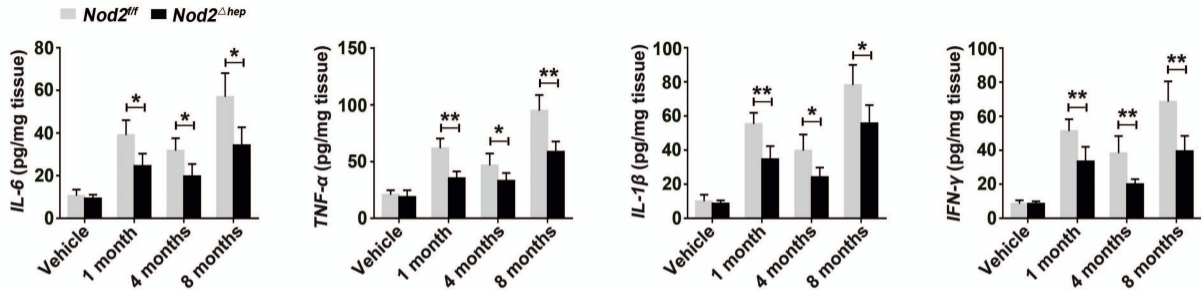

Online Fig. 5

**Online Fig. 5. Hepatic NOD2 deficiency reduces DEN/CCl<sub>4</sub>-induced liver inflammatory response.**

The concentration of IL-6, TNF $\alpha$ , IL-1 $\beta$  and IFN- $\gamma$  in livers of *Nod2<sup>ff</sup>* and *Nod2 <sup>$\Delta$ hep</sup>* mice treated with DEN/CCl<sub>4</sub> for the indicated time points was determined by ELISA, n = 6. Data were shown as mean  $\pm$  SD and significance was determined using ordinary one-way ANOVA with a Sidak test. \* $P < 0.05$ , \*\* $P < 0.01$ .

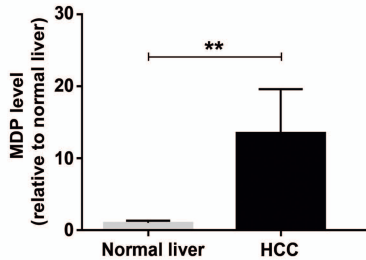

**Online Fig. 6**

**Online Fig. 6. Increased MDP concentration in HCC tissues.**

MDP level was increased in HCC tissues (n = 10), compared to normal liver tissues (n = 10). Data were shown as mean  $\pm$  SD and significance was determined using student's t test. **\*\* $P < 0.01$ .**

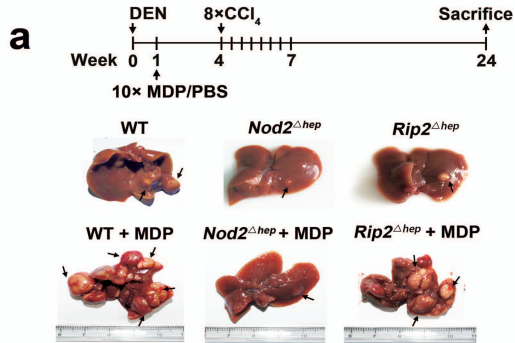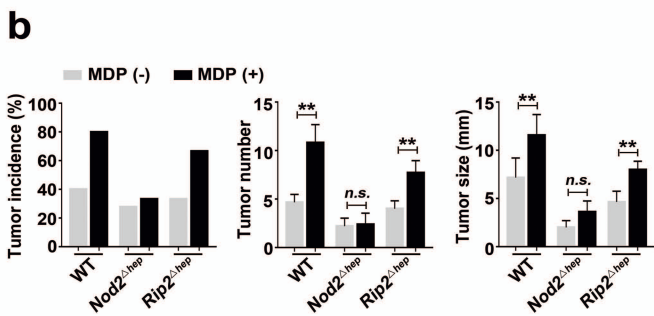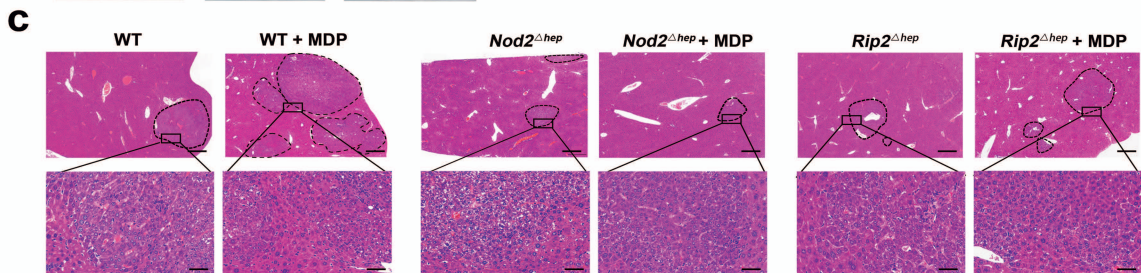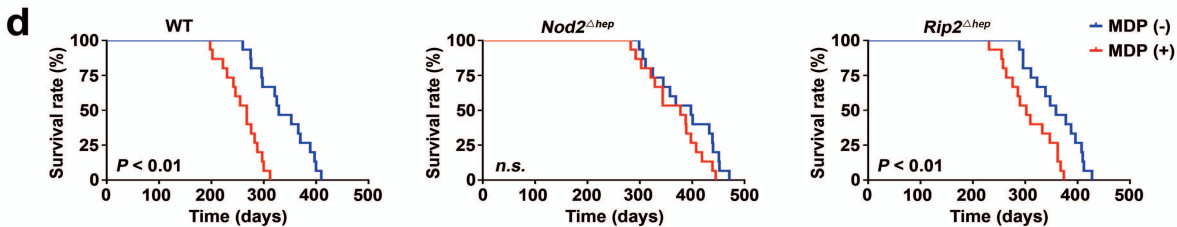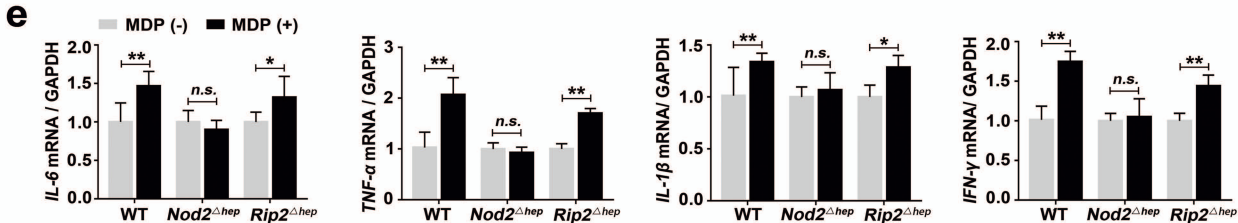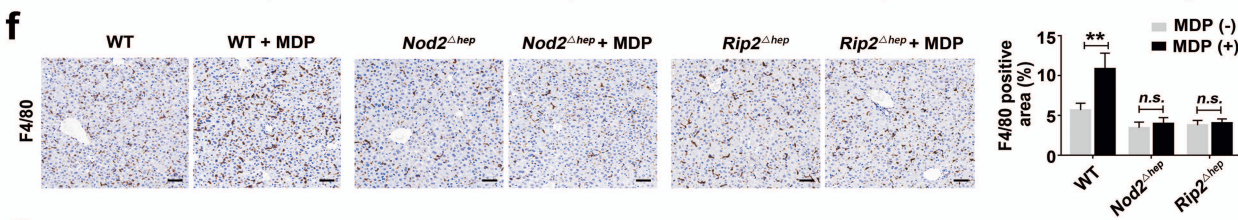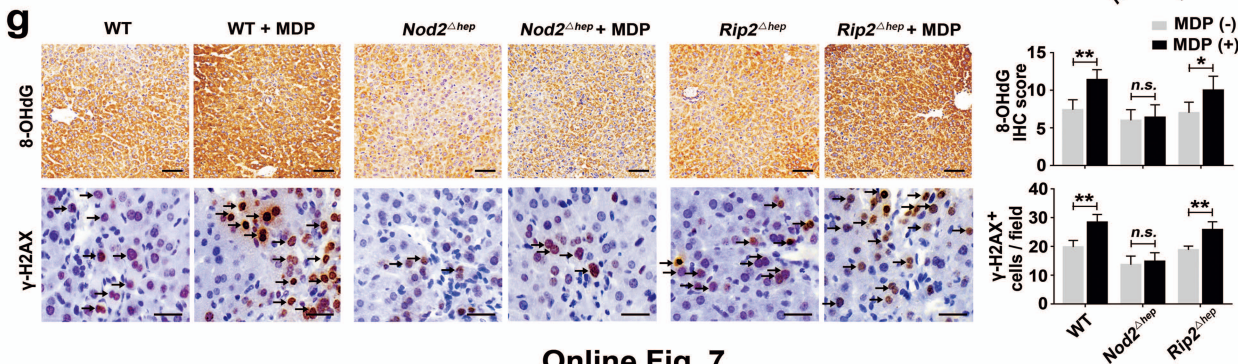

Online Fig. 7

**Online Fig. 7. NOD2 agonist MDP promotes hepatocarcinogenesis.**

**a-b** Male wild-type (WT), *Nod2* <sup>$\Delta$ hep</sup>, and *Rip2* <sup>$\Delta$ hep</sup> mice were injected with DEN (25 mg/kg, i.p.) at the age of 14-16 days followed by 8 injections of CCl<sub>4</sub> (1.2 ml/kg, i.p., biweekly, starting 4 weeks after DEN injection) and either MDP (100  $\mu$ g/mice, every other day) or PBS via intraperitoneal injection for 10 times starting three week before the first injection of CCl<sub>4</sub>. Mice were sacrificed 6 months after DEN injection. Representative gross appearance of the liver with tumors (**a**), as well as tumor incidence (**b**, left panel; untreated WT, n = 15; treated WT, n = 15; untreated *Nod2* <sup>$\Delta$ hep</sup>, n = 18; treated *Nod2* <sup>$\Delta$ hep</sup>, n = 15; untreated *Rip2* <sup>$\Delta$ hep</sup>, n = 15; treated *Rip2* <sup>$\Delta$ hep</sup>, n = 15) and quantification of tumor number (**b**, middle panel) and tumor size (**b**, right panel) in WT (untreated n = 6; treated n = 12), *Nod2* <sup>$\Delta$ hep</sup> (untreated n = 5; treated n = 5), and *Rip2* <sup>$\Delta$ hep</sup> (untreated n = 7; treated n = 10) mice. Arrowheads indicate tumors in liver. **c** Representative H&E staining images of liver sections from WT, *Nod2* <sup>$\Delta$ hep</sup>, and *Rip2* <sup>$\Delta$ hep</sup> mice at 6 months after DEN/CCl<sub>4</sub> treatment. Scale bar, 500  $\mu$ m (top panel) or 50  $\mu$ m (bottom panel). **d** Survival rate of WT, *Nod2* <sup>$\Delta$ hep</sup>, and *Rip2* <sup>$\Delta$ hep</sup> mice. n = 15. **e** Relative mRNA expression of *IL-6*, *TNF- $\alpha$* , *IL-1 $\beta$* , and *IFN- $\gamma$*  in liver tissues of WT, *Nod2* <sup>$\Delta$ hep</sup>, and *Rip2* <sup>$\Delta$ hep</sup> mice at 1 month after DEN/CCl<sub>4</sub> treatment, n = 5. **f-g** Representative immunohistochemistry images and quantification of F4/80 (**f**), 8-OHdG and  $\gamma$ -H2AX (**g**) in livers of WT, *Nod2* <sup>$\Delta$ hep</sup>, and *Rip2* <sup>$\Delta$ hep</sup> mice at 1 month after DEN/CCl<sub>4</sub> treatment, n = 5. Arrowheads indicate  $\gamma$ -H2AX<sup>+</sup> cells. Scale bar, 50  $\mu$ m (top panel) or 25  $\mu$ m (bottom panel). Data were shown as mean  $\pm$  SD and significance was determined using student's t test (**b**, **d**, **f**, and **g**). \**P* < 0.05, \*\**P* < 0.01, *n.s.*, not significant.

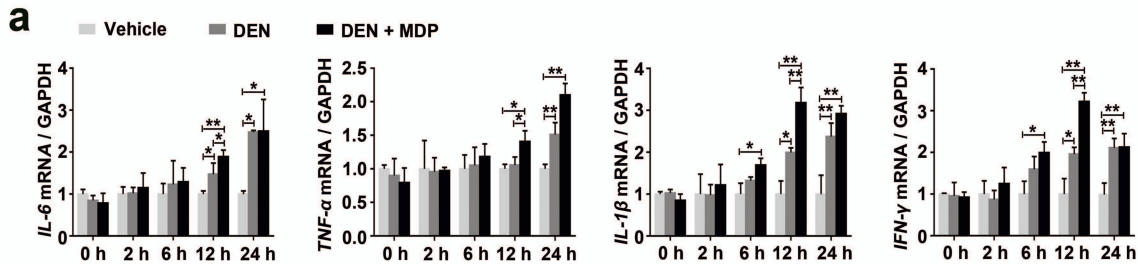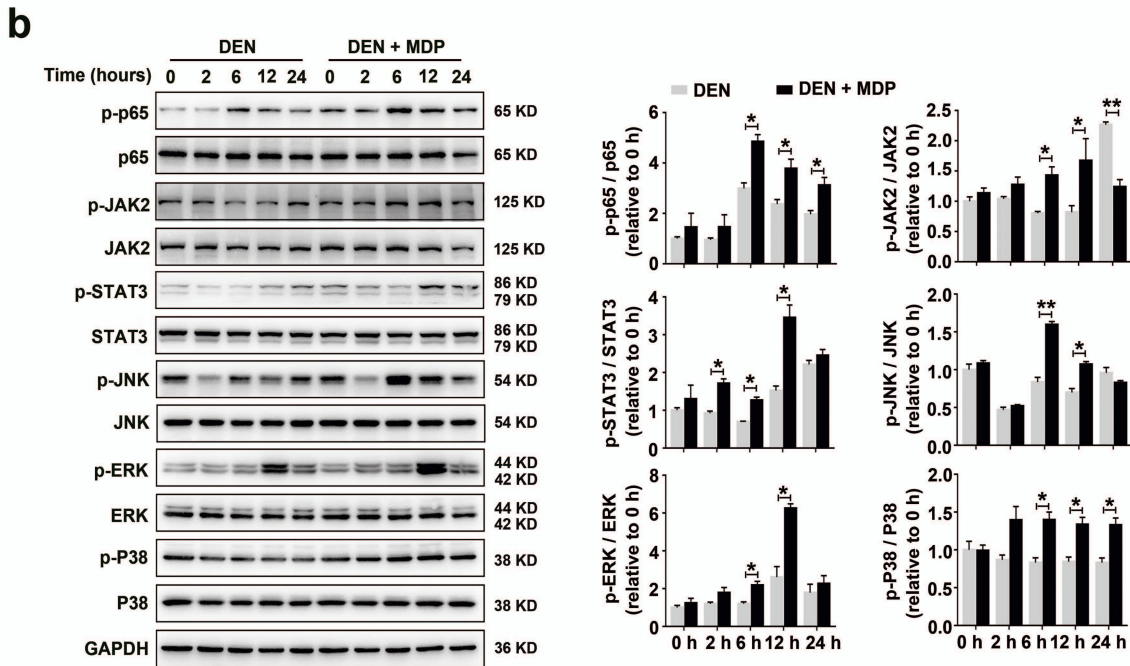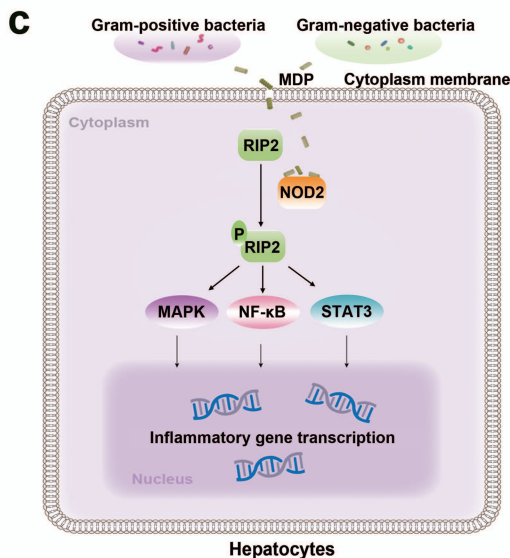

Online Fig. 8

**Online Fig. 8. NOD2 activation increases DEN/CCl<sub>4</sub>-induced inflammatory response in primary mouse hepatocytes.**

**a** Primary hepatocytes from wild-type (WT) mice were treated with DEN (100 µg/ml) in the presence or absence of MDP (10 µg/ml) for the indicated time points (0, 2, 6, 12 and 24 h), then the mRNA expression of *IL-6*, *TNF-α*, *IL-1β*, and *IFN-γ* was tested using qPCR, n = 3. **b** Primary hepatocytes were treated as described in **(a)**, and then the activation of NF-κB, JAK-STAT3, and MAPK pathways was examined using western blotting. Densitometric analysis of band intensity was shown in bar graph, n = 3. **c** Proposed schematic of hepatic NOD2 regulatory mechanisms in the inflammatory response. Data were shown as mean ± SD and significance was determined using ordinary one-way ANOVA with a Sidak test **(a and b)**. \**P* < 0.05, \*\**P* < 0.01.



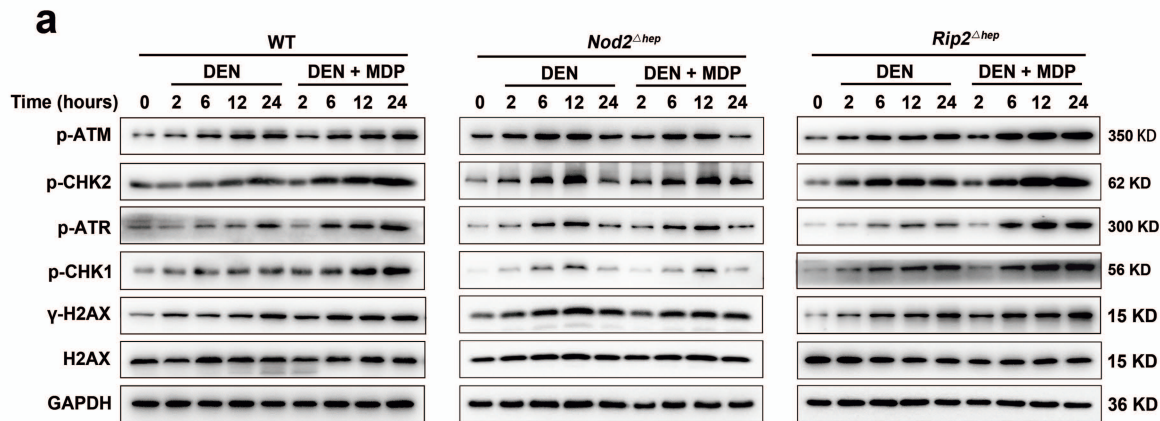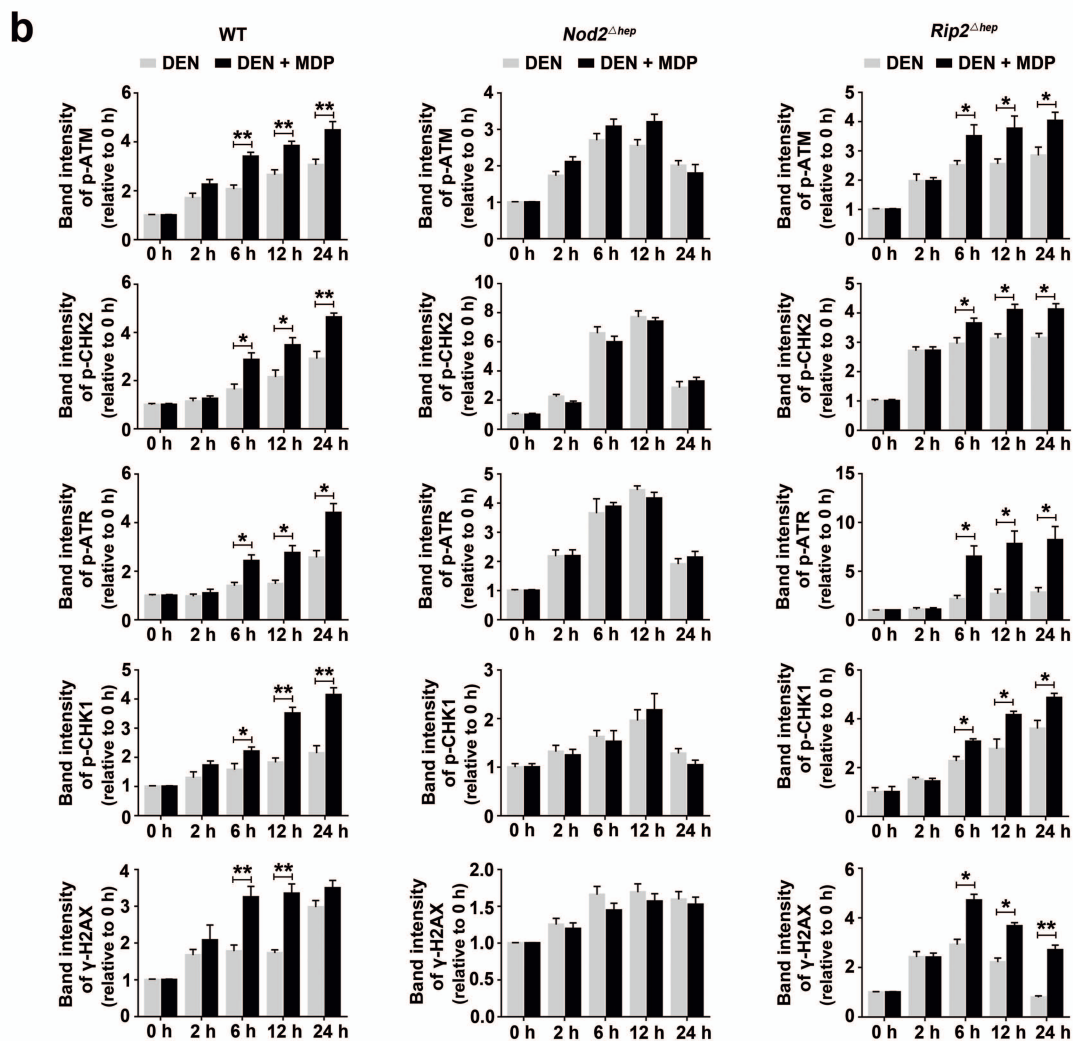

Online Fig. 9

**Online Fig. 9. NOD2 activation increases the activation of DNA damage response (DDR) pathway, and the level of  $\gamma$ -H2AX, in DEN-treated mouse hepatocytes, via an RIP2-independent manner.**

**a** Primary hepatocytes from wild-type (WT), *Nod2* <sup>$\Delta$ hep</sup>, and *Rip2* <sup>$\Delta$ hep</sup> mice were treated with DEN (100  $\mu$ g/ml) in the present or absent of MDP (10  $\mu$ g/ml) for the indicated time points (0, 2, 6, 12, and 24 h). Then the activation of DDR pathway (ATM/CHK2, ATR/CHK1) and the level of  $\gamma$ -H2AX in cells were examined by western blot analysis.

**b** Densitometric analysis of band intensity of western blots, n = 3. Data were shown as mean  $\pm$  SD and significance was determined using student's t test (**b**). \**P* < 0.05, \*\**P* < 0.01.



**Online Fig. 10. The role of NOD2/lamin A/C interaction network in DNA damage repair process.**

**a** Coomassie brilliant blue-stained SDS-PAGE gel of NOD2 immunoprecipitates from HCC samples. IgG immunoprecipitates were loaded as control. **b** Representative mass spectrometry (MS) spectra of lamin A/C peptide. **c** Protein-protein interaction network of lamin A/C with proteins related to DNA damage repair. Yellow node: DNA double strand break repair signaling; purple node: DNA damage response signaling; blue node: excision repair signaling; orange node: mismatch repair signaling. RNA-seq data (*Nod2* <sup>$\Delta$ hep</sup> and *Nod2*<sup>ff</sup> transcriptomes), String database (<https://string-db.org/>) and Cytoscape 3.2.1 (<http://www.cytoscape.org/>) were used to output the network.

**a**

| Predicted bipartite NLS |                                |       |
|-------------------------|--------------------------------|-------|
| Pos.                    | Sequence                       | Score |
| 407                     | LRKFVVRTECQLKGFSEEGIQLYLKHHREP | 6.2   |

**c**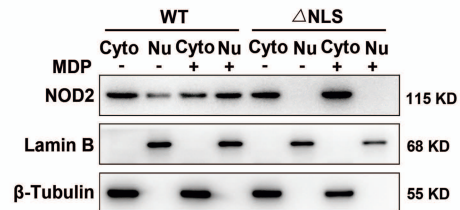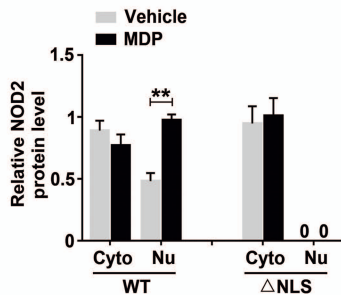**b**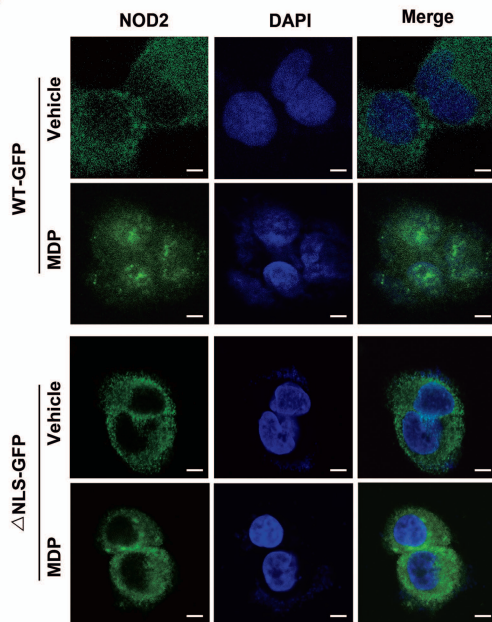

**Online Fig. 11. NOD2 harbors a nuclear localization sequence (NLS).**

**a** Identification of NLS on NOD2 (amino acids 407-436) using cNLS mapper program ([http://nls-mapper.iab.keio.ac.jp/cgi-bin/NLS\\_Mapper\\_form.cgi](http://nls-mapper.iab.keio.ac.jp/cgi-bin/NLS_Mapper_form.cgi)). **b** NLS motif (amino acids 407-436) is required for the nuclear translocation of NOD2. 293T cells were transfected with GFP-tagged full-length NOD2, or GFP-tagged NOD2 with NLS fragment amino acids 407-436 deletion ( $\Delta$ NLS) plasmid. After MDP (10  $\mu$ g/ml) treatment for 1 h, the protein levels of NOD2 in nucleus and cytoplasm were observed using confocal microscope. Scale bar, 10  $\mu$ m. **c** 293T cells were treated with or without MDP (10  $\mu$ g/ml) for 1 h, then nuclear and cytoplasmic subcellular fractions were extracted as described in Materials and method. The protein levels of NOD2 in nucleus and cytoplasm were examined using western blotting. Quantitative analysis of band intensity was shown as bar graph. Data were shown as mean  $\pm$  SD and significance was determined using student's t test (**c**). n = 3; \*\* $P$  < 0.01.

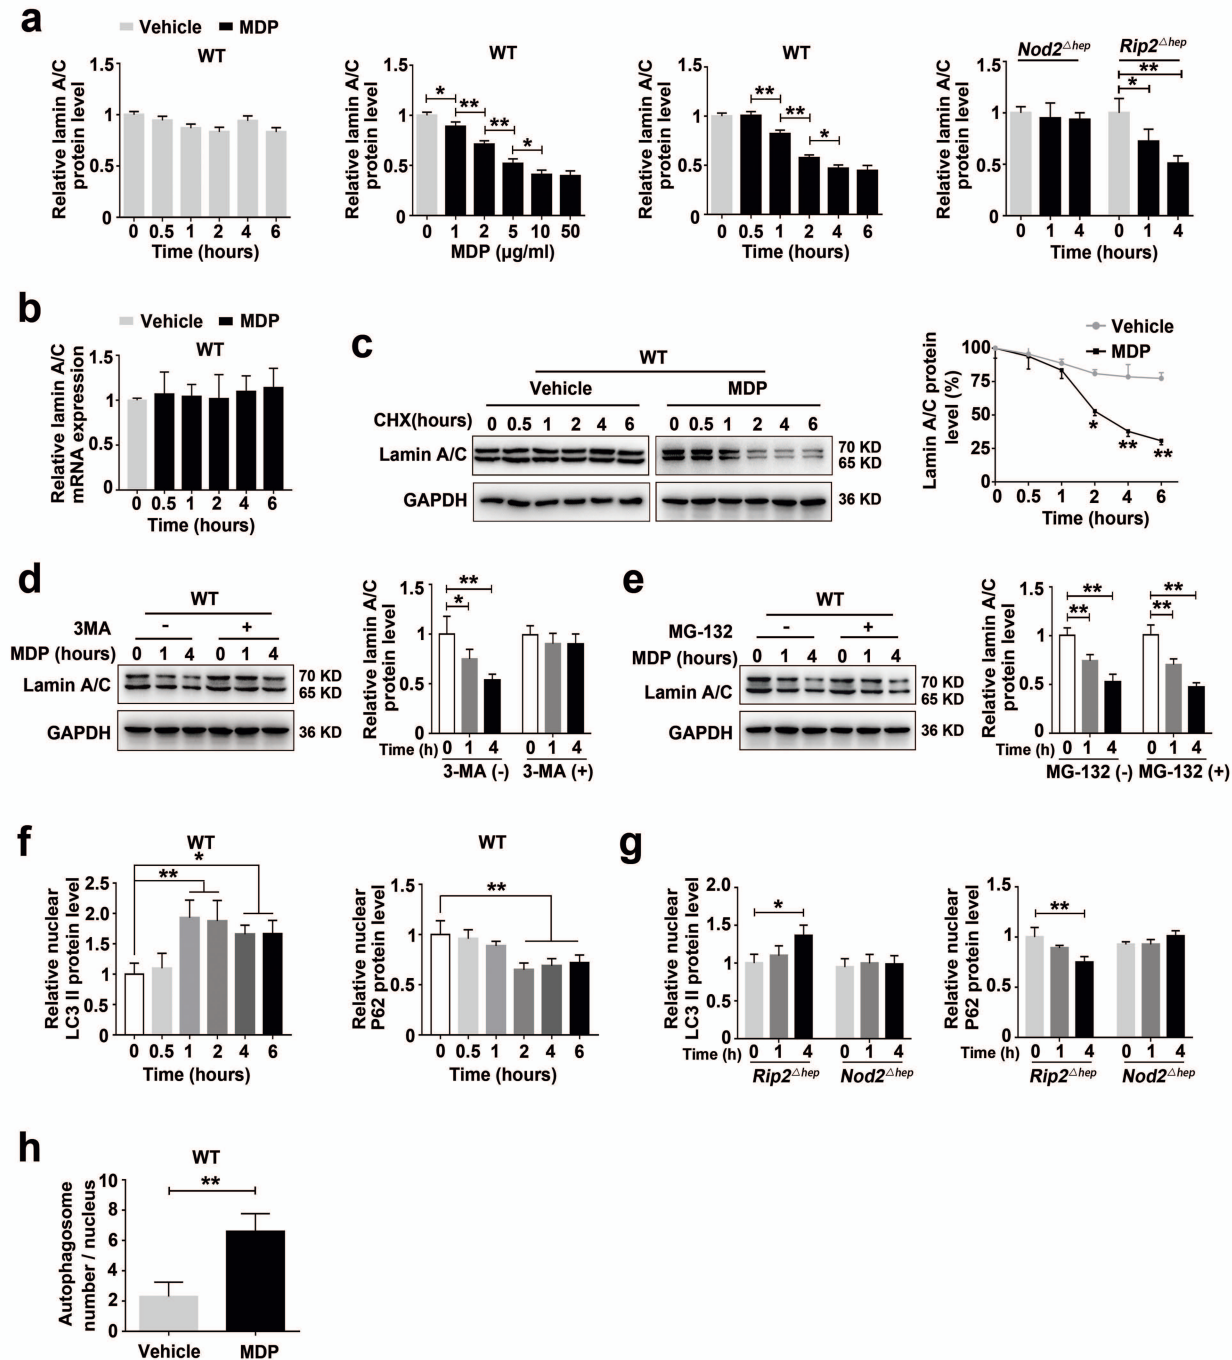

Online Fig. 12

**Online Fig. 12. NOD2 activation regulates the protein stability of lamin A/C, but not the transcription of lamin A/C, through nuclear autophagy.**

**a** Densitometric quantification of immunoblotting results corresponding to Figure 5d showed that NOD2 activation reduces the protein level of lamin A/C in primary hepatocytes,  $n = 3$ . **b** NOD2 activation does not affect the mRNA expression of lamin A/C. Primary hepatocytes from wild-type (WT) were treated with MDP (10  $\mu\text{g/ml}$ ) for the indicated time points (0, 0.5, 1, 2, 4, and 6 h), then the mRNA expression of lamin A/C was tested by qPCR,  $n = 3$ . **c** NOD2 activation reduces the protein stability of lamin A/C. Left panel: primary hepatocytes were pretreated with cycloheximide (CHX, 100  $\mu\text{M}$ ) for 1 h followed by vehicle or MDP (10  $\mu\text{g/ml}$ ) stimulation, then the protein level of lamin A/C was examined at the indicated time using western blotting. Right panel: quantification of lamin A/C protein level,  $n = 3$ . **d-e** NOD2 activation induces the degradation of lamin A/C protein through autophagy pathway. Primary hepatocytes were pre-incubated with or without MG-132 (30  $\mu\text{M}$ , **d**) or 3-MA (10 mM, **e**) for 1 h. Then cells were treated with MDP (10  $\mu\text{g/ml}$ ) for the indicated times and the lamin A/C protein level was determined by western blotting. Column bar graph showing densitometric quantification of lamin A/C band intensity relative to GAPDH,  $n = 3$ . **f** Densitometric quantification of immunoblotting results of nucleus LC3-II or P62 band intensity relative to lamin B in Figure 5e,  $n = 3$ . **(g)** Densitometric quantification of immunoblotting results corresponding to Figure 5f,  $n = 3$ . **(h)** Quantification of nuclear autophagosomes corresponding to Figure 5g showing that NOD2 activation induces the formation of nuclear autophagosomes,  $n = 10$ . Data were shown as mean  $\pm$  SD and



significance was determined using Ordinary two-way (**c**) or one-way ANOVA with a Sidak test (**a, d, e, f, g**), and student's t test (**h**). \* $P < 0.05$ , \*\* $P < 0.01$ .

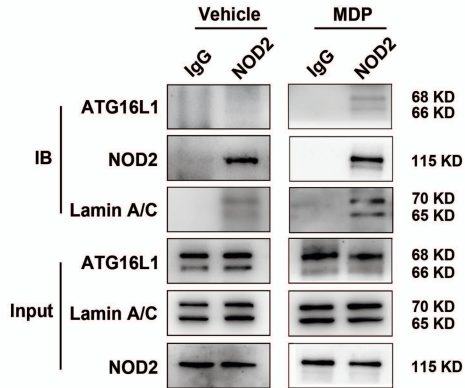

**Online Fig. 13**

**Online. 13. NOD2 interacts with ATG16L1, a component of the LC3-conjugation complex.**

Hepatocytes expressed HA-NOD2 were treated with or without MDP (10  $\mu\text{g/ml}$ ) for 1 h, then the interaction between NOD2 and ATG16L1 was determined by co-immunoprecipitation analysis.

**a**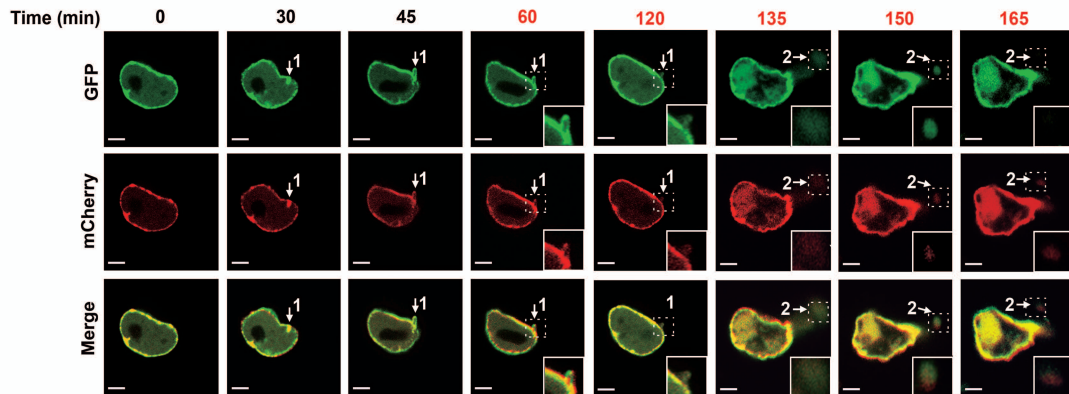**b**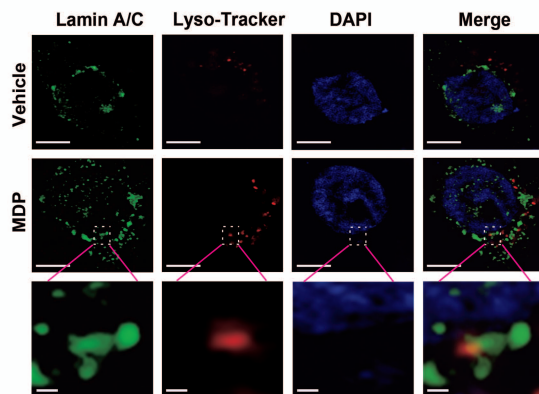**c**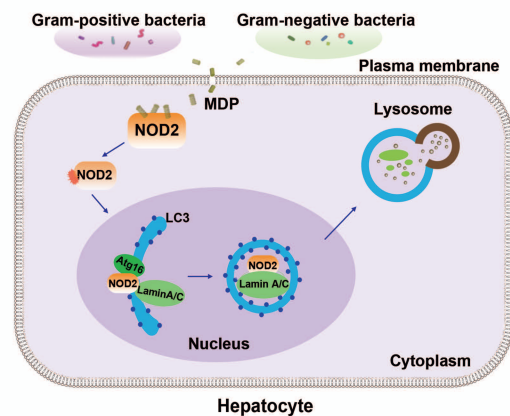

**Online Fig. 14. Live-cell imaging analysis of mCherry-GFP-lamin A/C in hepatocytes.**

**a** Time-lapse image of mCherry-GFP-lamin A/C hepatocytes showed that lamin A/C translocates from nucleus to cytoplasm and enters lysosome for degradation after MDP treatment. Primary hepatocytes infected with adenovirus encoding mCherry-GFP-lamin A/C were treated with MDP (10  $\mu\text{g/ml}$ ) for the indicated time points. Nucleus-to-cytoplasm transport events were labeled sequentially as indicated. Arrows showing that nuclear membrane blebs in event 1 and lamin A/C enters the lysosome from the cytoplasm in event 2. Scale bar, 5  $\mu\text{m}$ . **b** MDP-treated hepatocytes were stained with Lyso-Tracker Red and lamin A/C (green), and imaged by super-resolution microscopy. Scale bar, 5  $\mu\text{m}$  (top and middle panel) or 50  $\mu\text{m}$  (bottom panel). **c** Proposed schematic of hepatic NOD2-initiated nuclear autophagy.

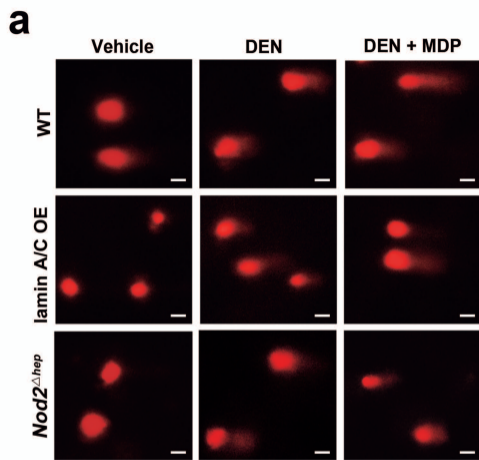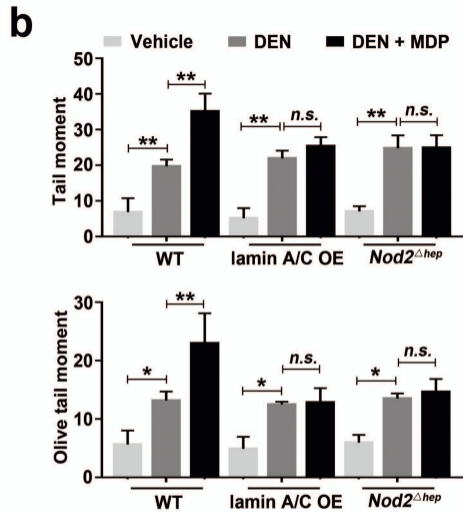

Online Fig. 15

**Online Fig. 15. Lamin A/C overexpression rescues the aggravating effect of NOD2 activation on DEN-induced DNA damage in hepatocytes.**

**a** The aggravating effect of NOD2 activation on DNA double-strand break (DSB) was largely rescued by overexpressing lamin A/C in DEN-treated hepatocytes. wild-type (WT) mice hepatocytes, WT mice hepatocytes transfected with lamin A/C-overexpression (lamin A/C OE) plasmids, and *Nod2* <sup>$\Delta$ hep</sup> mice hepatocytes were treated with DEN (100  $\mu$ g/ml) for 1 h, and the DSB was detected by Comet Assay. **b** Quantification of the amount of DNA damage, as measured by the comet tail moment and olive tail moment. At least 50 cells were scored. Data were shown as mean  $\pm$  SD and significance was determined using Ordinary one-way ANOVA with a Sidak test (**b**).

\* $P < 0.05$ , \*\* $P < 0.01$ , *n.s.*, not significant. Scale bar, 100  $\mu$ m.

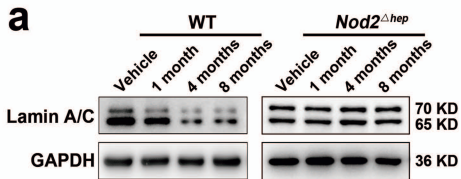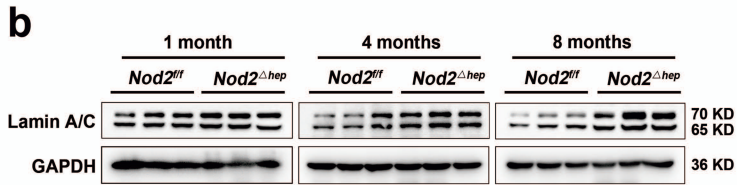

Online Fig. 16



**Online Fig. 16. Lamin A/C expression decreases during the progression of DEN/CCl<sub>4</sub>-induced HCC.**

**a** Western blotting analysis and quantification of lamin A/C in the livers of WT and *Nod2*<sup>Δ<sub>hep</sub> mice at the indicated time points (1, 4, and 8 months) after DEN/CCl<sub>4</sub> treatment, n = 3. **b** Western blotting analysis and quantification of lamin A/C in the livers of *Nod2*<sup>ff</sup> and *Nod2*<sup>Δ<sub>hep</sub> mice at the indicated time points after DEN/CCl<sub>4</sub> treatment, n = 3. Data were shown as mean ± SD and significance was determined using Ordinary one-way ANOVA with a Sidak test (**a**) and student's t test (**b**). \**P* < 0.05, \*\**P* < 0.01.</sup></sup>

**a**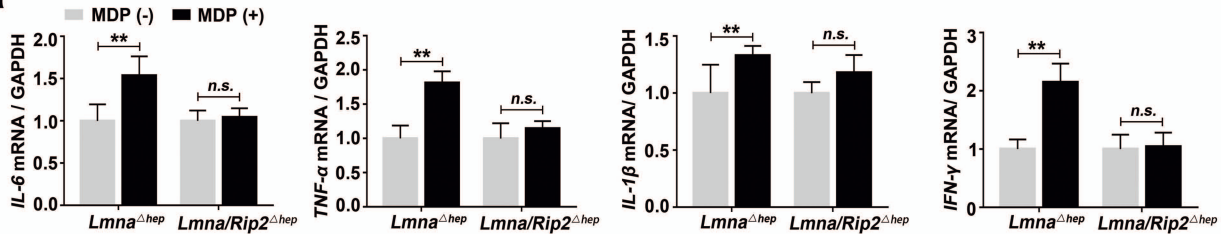**b**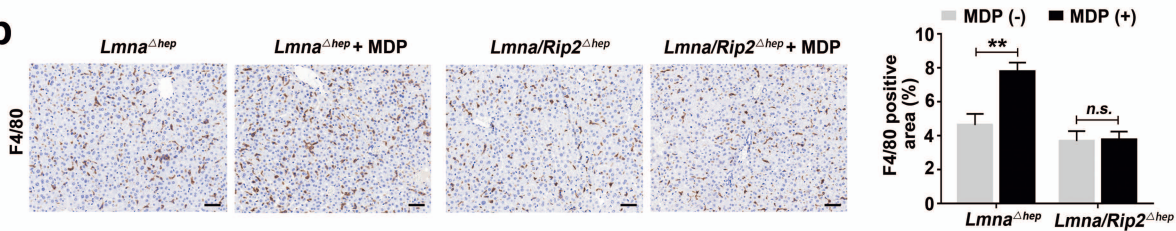

Online Fig. 17

**Online Fig. 17. MDP increases DEN/CCl<sub>4</sub>-induced inflammatory response in *Lamn*<sup>Δ*hep*</sup>, but not in *Rip2/Lamn*<sup>Δ*hep*</sup> mice.**

Male *Lamn*<sup>Δ*hep*</sup> and *Rip2/Lamn*<sup>Δ*hep*</sup> mice were treated as Figure 7a. Mice were sacrificed 1 month after DEN injection. **a** Relative mRNA expression of *IL-6*, *TNF-α*, *IL-1β*, and *IFN-γ* in liver tissues of *Lamn*<sup>Δ*hep*</sup> and *Rip2/Lamn*<sup>Δ*hep*</sup> mice, n = 5. **b** Representative immunohistochemistry images and quantification of F4/80 in liver tissues of *Lamn*<sup>Δ*hep*</sup> and *Rip2/Lamn*<sup>Δ*hep*</sup> mice, n = 5. Scale bar, 50 μm. Data were shown as mean ± SD and significance was determined using ordinary two-way ANOVA with a Sidak test (**a** and **b**). \*\**P* < 0.01, *n.s.*, not significant.

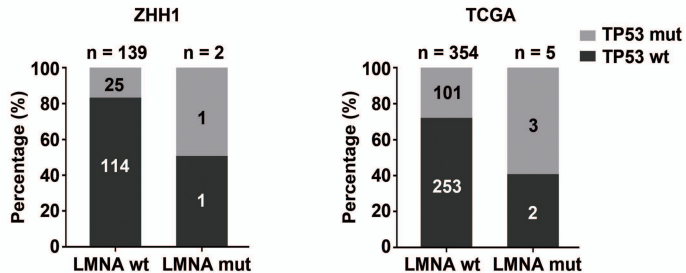

**Online Fig. 18**

**Online Fig. 18. LMNA mutation associated with increased genomic instability in HCC.**

Mutation status of LMNA and TP53 in ZHH1 cohort (n = 141) and in TCGA HCC cohort (n = 359).
